# Supplementary material
Source: Springer Nature journal article supplement (https://www.springermedizin.de/resource/supplementary/12936_2009_1052_MOESM4_ESM.pdf/9548874)

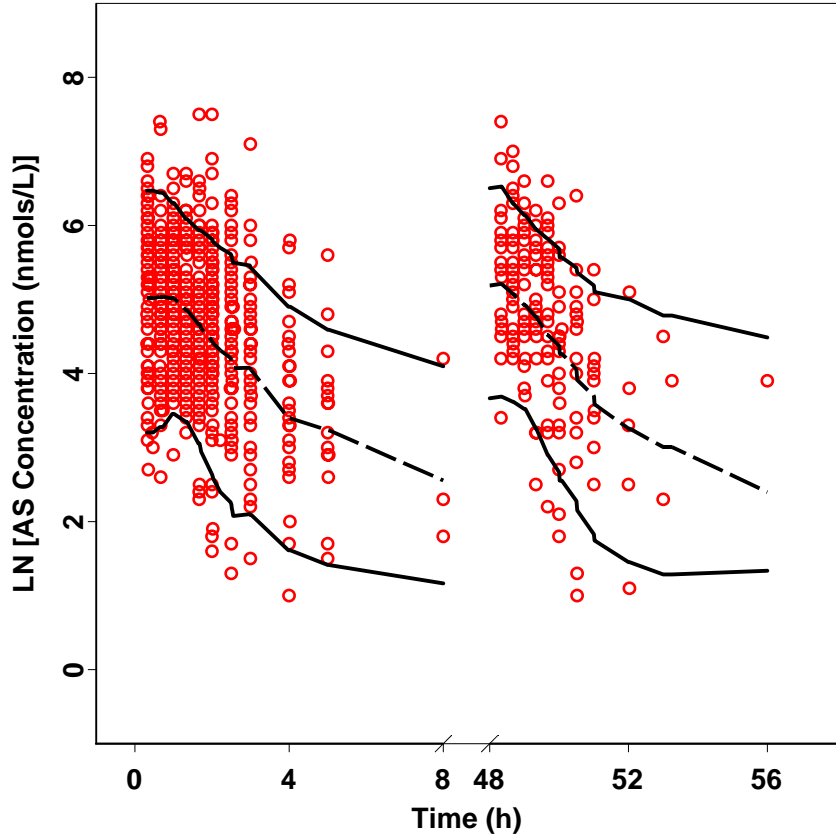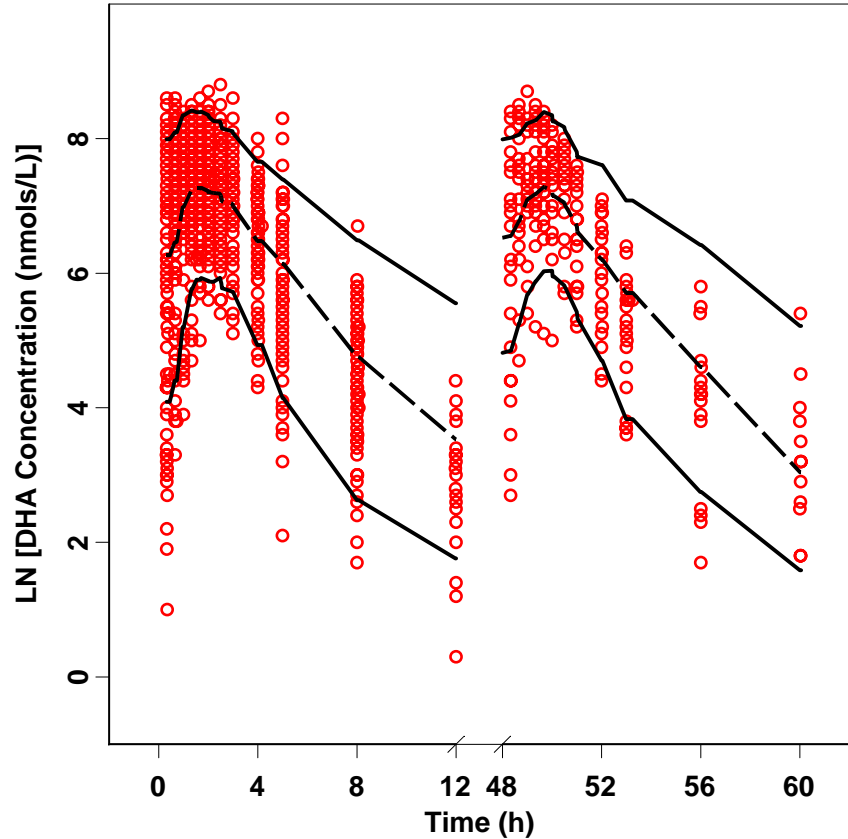

Supplement: MOESM4 [file 9548874]
